# Supplementary material for: Mathematical Approach to Estimating the Main Epidemiological Parameters of African Swine Fever in Wild Boar
Source: MDPI journal article supplement (doi:10.3390/vaccines8030521), 2020-09-12
Supplement: s1 [file s1]

**Supplementary Materials:** The following are available online at [www.mdpi.com/xxx/s1](http://www.mdpi.com/xxx/s1),

**Table S1:** Data on wild boar that were African swine fever virus (ASFV) tested for both virology and serology during the last three hunting season (from November to January), presented as contingency table with number of wild boar (percentage) for each category. Data about animals not tested for both serology and virology were excluded.

|                             |              | Virus positive | Virus negative | Total |
|-----------------------------|--------------|----------------|----------------|-------|
| Hunting season<br>2011–2012 | Seropositive | 0 (0)          | 0 (0)          | 0     |
|                             | Seronegative | 1 (1.4)        | 70 (98.6)      | 71    |
|                             | Total        | 1              | 70             | 71    |
| Hunting season<br>2012–2013 | Seropositive | 0 (0)          | 4 (3.2)        | 4     |
|                             | Seronegative | 1 (0.8)        | 120 (96)       | 121   |
|                             | Total        | 1              | 124            | 125   |
| Hunting season<br>2013–2014 | Seropositive | 3 (0.6)        | 6 (1.2)        | 9     |
|                             | Seronegative | 14 (2.9)       | 454 (95.2)     | 468   |
|                             | Total        | 17             | 460            | 477   |
| Hunting season<br>2014–2015 | Seropositive | 2 (0.6)        | 13 (4.0)       | 14    |
|                             | Seronegative | 1 (0.3)        | 307 (95.0)     | 309   |
|                             | Total        | 3              | 320            | 323   |
| Hunting season<br>2015–2016 | Seropositive | 3 (0.4)        | 23 (3.9)       | 26    |
|                             | Seronegative | 0 (0)          | 583 (95.7)     | 583   |
|                             | Total        | 3              | 606            | 609   |
| Hunting season<br>2016–2017 | Seropositive | 0 (0)          | 29 (2.9)       | 29    |
|                             | Seronegative | 0 (0)          | 973 (97.1)     | 973   |
|                             | Total        | 0 (0)          | 1002           | 1002  |
| Hunting season<br>2017–2018 | Seropositive | 0 (0)          | 12 (1.1)       | 12    |
|                             | Seronegative | 0 (0)          | 1142 (98.9)    | 1142  |
|                             | Total        | 0 (0)          | 1154           | 1154  |
| Hunting season<br>2018–2019 | Seropositive | 0 (0)          | 8 (0.6)        | 8     |
|                             | Seronegative | 0 (0)          | 1248 (99.3)    | 1248  |
|                             | Total        | 0 (0)          | 1256           | 1256  |
| Hunting season<br>2019–2020 | Seropositive | 0 (0)          | 5 (0.4)        | 5     |
|                             | Seronegative | 0 (0)          | 1303 (99.6)    | 1303  |
|                             | Total        | 0 (0)          | 1308           | 1308  |

**Table S2.** Summarize of baseline database created for the passive surveillance in Anglona-Gallura area, including the year (from 2011 to 2020), number of found dead wild boar, number of those tested for African swine fever virus (ASFV) presence or antibody presence, and the number of animals virus positive or seropositive. Data are presented as number and percentage.

| Year | Wild boar<br>found dead | Wild boar<br>virologically <sup>1</sup><br>tested (n, %) | Virus<br>positive | Wild boar<br>serologically <sup>2</sup><br>tested (n, %) | Seropositive <sup>3</sup> |
|------|-------------------------|----------------------------------------------------------|-------------------|----------------------------------------------------------|---------------------------|
| 2011 | 10                      | 3 (30.0)                                                 | 0 (0)             | 7 (70.0)                                                 | 0 (0)                     |
| 2012 | 10                      | 6 (60.0)                                                 | 0 (0)             | 6 (60.0)                                                 | 0 (0)                     |
| 2013 | 17                      | 7 (41.2)                                                 | 0 (0)             | 8 (47.0)                                                 | 0 (0)                     |
| 2014 | 29                      | 23 (79.3)                                                | 0 (0)             | 9 (31.0)                                                 | 0 (0)                     |
| 2015 | 21                      | 14 (66.7)                                                | 0 (0)             | 15 (71.4)                                                | 0 (0)                     |
| 2016 | 24                      | 19 (79.1)                                                | 0 (0)             | 9 (37.5)                                                 | 0 (0)                     |
| 2017 | 24                      | 19 (79.1)                                                | 0 (0)             | 15 (62.5)                                                | 0 (0)                     |

|              |            |                   |              |                   |              |
|--------------|------------|-------------------|--------------|-------------------|--------------|
| <b>2018</b>  | 17         | 17 (100)          | 0 (0)        | 8 (47.0)          | 0 (0)        |
| <b>2019</b>  | 76         | 75 (98.7)         | 0 (0)        | 25 (32.9)         | 0 (0)        |
| <b>2020</b>  | 40         | 35 (87.5)         | 0 (0)        | 18 (45.0)         | 0 (0)        |
| <b>Total</b> | <b>268</b> | <b>218 (81.3)</b> | <b>0 (0)</b> | <b>120 (44.8)</b> | <b>0 (0)</b> |

<sup>1</sup> Virus presence was assessed by Real Time PCR, Quantitative PCR or Malmquist test. <sup>2</sup> Wild boar serologically tested are those tested with at least screening ELISA test (Ingezim PPA Compac®, Ingenasa, Madrid, Spain), and eventually confirmed (if positive) with immunoblotting (IB) test, in accordance to the Manual of diagnostic test and vaccines from terrestrial animals. <sup>3</sup> Serum samples were considered positive when they scored positive in both the screening (ELISA) and the confirmatory (IB) tests.
